# Supplementary material
Source: PubMed Central journal article supplement (PMC8323159)

A.

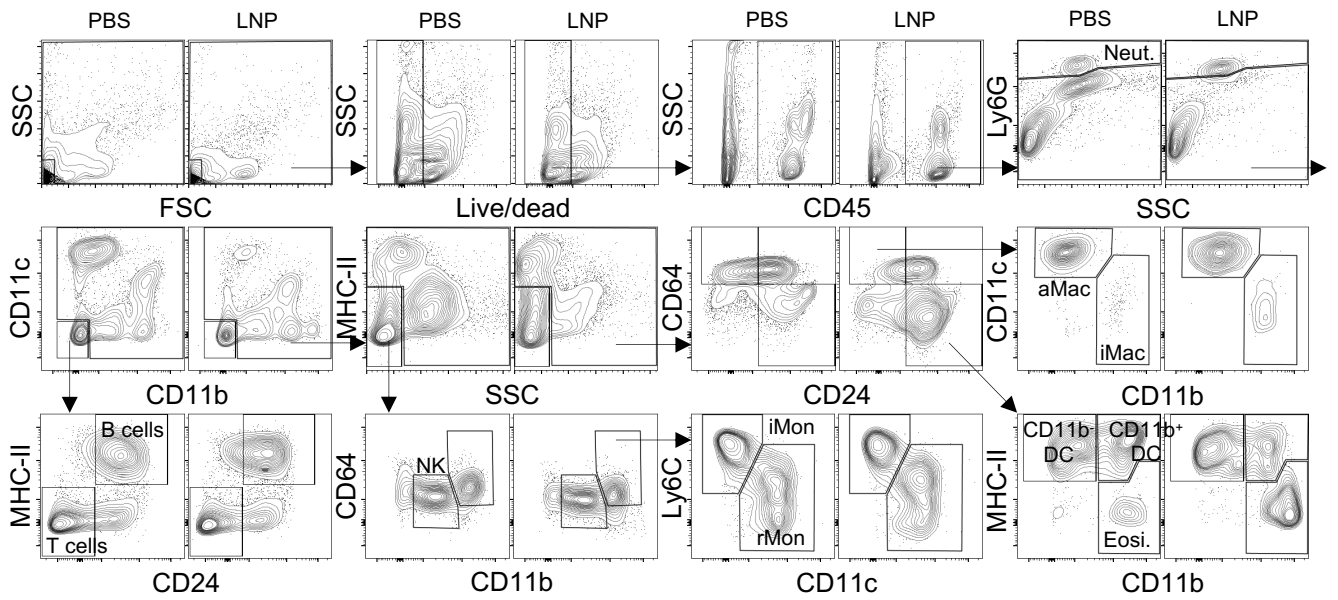

B.

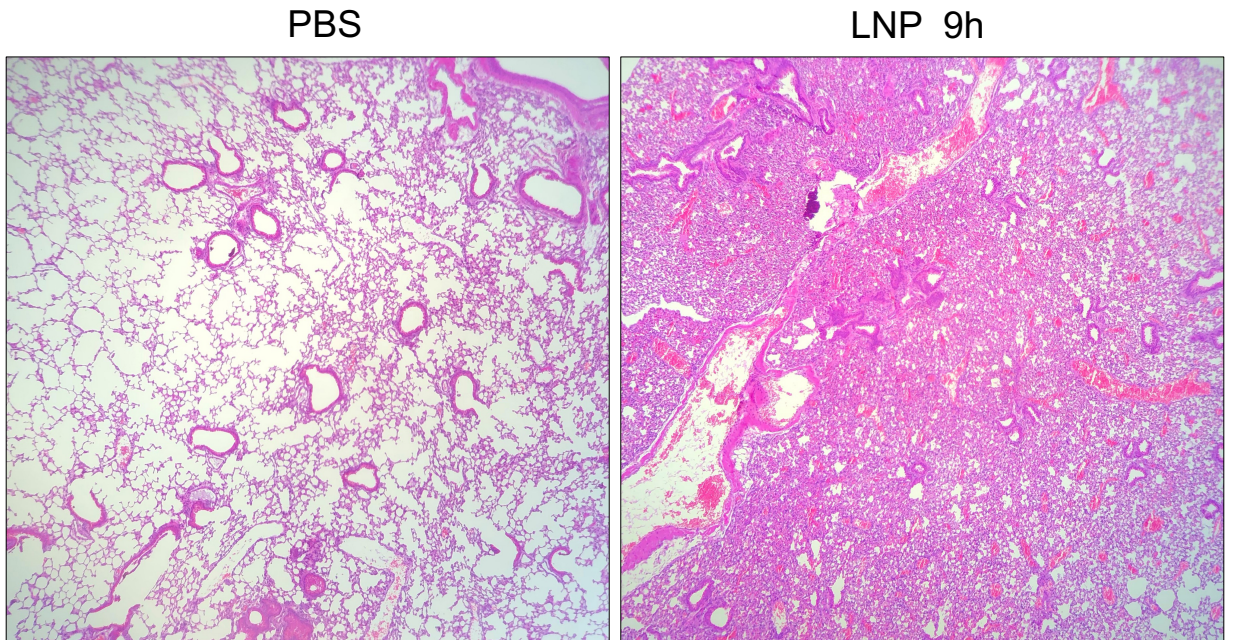

Supplement: media-3.pdf [file media-3.pdf]
